# Supplementary material for: Systemic brain tumor delivery of synthetic protein nanoparticles for glioblastoma therapy
Source: PubMed Central journal article supplement (PMC7655867; doi:10.1038/s41467-020-19225-7), 2020-11-10
Supplement: 41467_2020_19225_MOESM1_ESM.pdf [file 41467_2020_19225_MOESM1_ESM.pdf]

# **Systemic Brain Tumor Delivery of Synthetic Protein Nanoparticles for Glioblastoma Therapy**

**Gregory et al.**

## **Supplementary Information:**

Supplementary Table 1

Supplementary Methods Tables 2 - 8

Supplementary Figures 1 - 19

## Supplementary Tables

**Supplementary Table 1. Mouse serum biochemical analysis following intravenous STAT3i SPNP + IR treatment 23 DPI (n = 3)**

| Group             | Creatinine ( $\mu\text{M}$ ) | BUN (mM)     | ALT ( $\text{U L}^{-1}$ ) | AST ( $\text{U L}^{-1}$ ) |
|-------------------|------------------------------|--------------|---------------------------|---------------------------|
| Saline            | 0.21 $\pm$ 0.10              | 26 $\pm$ 3.1 | 111 $\pm$ 45.2            | 328 $\pm$ 31.4            |
| STAT3i            | 0.20 $\pm$ 0.04              | 23 $\pm$ 5.0 | 98 $\pm$ 9.2              | 331 $\pm$ 40.2            |
| SPNPs             | 0.23 $\pm$ 0.10              | 27 $\pm$ 2.1 | 102 $\pm$ 4.0             | 342 $\pm$ 32.1            |
| STAT3i SPNPs      | 0.17 $\pm$ 0.20              | 23 $\pm$ 3.0 | 97 $\pm$ 3.5              | 332 $\pm$ 28.2            |
| STAT3i SPNPs + IR | 0.20 $\pm$ 0.06              | 28 $\pm$ 1.2 | 99 $\pm$ 2.6              | 320 $\pm$ 45.0            |

## Supplementary Methods

**Supplementary Table 2. Particle synthesis materials**

| Material                                                           | Source         | Catalog number |
|--------------------------------------------------------------------|----------------|----------------|
| Human serum albumin                                                | Sigma Aldrich  | A3782          |
| O,O'-Bis[2-(N-Succinimidyl-succinylamino)ethyl]polyethylene glycol | Sigma Aldrich  | 713783         |
| ethylene glycol                                                    | Sigma Aldrich  | 324558         |
| UltraPure DNase/RNase-free distilled water                         | Thermo Fisher  | 10977015       |
| Albumin from bovine serum Alexa Fluor 647cConjugate                | Thermo Fisher  | A24785         |
| Albumin from bovine serum Alexa Fluor 488 conjugate                | Thermo Fisher  | A13100         |
| Silencer GFP (eGFP) siRNA                                          | Thermo Fisher  | AM4626         |
| Silence Cy3-labeled negative control siRNA                         | Thermo Fisher  | AM4621         |
| SignalSilence STAT3 siRNA I mouse                                  | Cell Signaling | 6353           |
| Polyethyleneimine                                                  | Sigma Aldrich  | 181978         |
| iRGD peptide                                                       | Ruoslahti Lab  | N/A            |

**Supplementary Table 3. Capillary immunoassay reagents / antibodies**

| <b>Material (Antibody / Dilution)</b>               | <b>Source</b>  | <b>Catalog number</b> |
|-----------------------------------------------------|----------------|-----------------------|
| Beta Actin (13E5) rabbit mAb<br>1:50                | Cell Signaling | 4970                  |
| GAPDH (14C10) rabbit mAb<br>1:50                    | Cell Signaling | 2118S                 |
| STAT3 (D3Z2G) rabbit mAb<br>1:50                    | Cell Signaling | 12640                 |
| Phospho-STAT3 (Tyr705) (D3A7) XP rabbit mAb<br>1:50 | Cell Signaling | 9145                  |

**Supplementary Table 4. Immunofluorescence reagents**

| <b>Material</b>                                  | <b>Source</b> | <b>Catalog number</b> |
|--------------------------------------------------|---------------|-----------------------|
| Anti-LAMP1 antibody [EPR21026]<br>1:100          | abcam         | ab208943              |
| Goat anti rabbit IgG HL Alexa Fluor 555<br>1:200 | abcam         | ab150078              |
| Prolong diamond antifade mountant with DAPI      | Thermo Fisher | P36966                |

**Supplementary Table 5. Flowcytometry antibodies**

| <b>Antibodies / Dilution</b>                        | <b>Source</b>     | <b>Catalog number</b> |
|-----------------------------------------------------|-------------------|-----------------------|
| V450 rat anti mouse CD45<br>1:200                   | BD Bioscience     | 560501                |
| PE Rat anti mouse F4/80<br>1:200                    | Biolegend         | 123110                |
| Alexa Fluor 700 rat anti mouse CD206<br>1:200       | Biolegend         | 9661                  |
| PE Armenian hamster anti mouse CD11C<br>1:200       | Biolegend         | 117308                |
| PercpCy5.5 rat anti mouse B220<br>1:200             | Biolegend         | 103236                |
| FITC rat anti mouse CD8<br>1:200                    | Biolegend         | 100706                |
| PercpCy5.5 Armenian hamster anti mouse CD3<br>1:200 | Biolegend         | 100328                |
| PB rat anti mouse Granzyme B<br>1:200               | Biolegend         | 515407                |
| PE rat anti mouse IFN $\gamma$<br>1:200             | Biolegend         | 505808                |
| PE-Tetramer<br>1:100                                | MBL International | TB-5001-1             |
| Efluor 780-Live/Dead<br>1:200                       | Affymetrics       | 65-0865-14            |

**Supplementary Table 6. Immunohistochemistry primary antibodies**

| <b>Antibodies / Dilution</b>     | <b>Source</b> | <b>Catalog number</b> |
|----------------------------------|---------------|-----------------------|
| Rat anti mouse MBP<br>1:300      | Millipore     | MAB386                |
| Rabbit anti mouse CD8<br>1: 2000 | Cedarlane     | 361003                |
| Rat anti mouse F4/80<br>1:500    | BioRad        | MCA497RT              |

**Supplementary Table 7. Immunohistochemistry secondary antibodies**

| <b>Antibodies / Dilution</b>                            | <b>Source</b> | <b>Catalog number</b> |
|---------------------------------------------------------|---------------|-----------------------|
| Goat polyclonal anti rabbit biotin-conjugated<br>1:1000 | Dako          | E0432                 |
| Goat polyclonal anti rat Alexa Fluor 594<br>1:1000      | Thermo Fisher | A-11007               |
| Goat polyclonal anti rabbit biotin-conjugated<br>1:1000 | Thermo Fisher | 31830                 |

**Supplementary Table 8. Reagents for cell culture**

| <b>Reagent</b>                            | <b>Source</b>       | <b>Catalog number</b> |
|-------------------------------------------|---------------------|-----------------------|
| Dulbecco's modified eagle medium (DMEM)   | Thermo Fisher       | 12430054              |
| Heat-inactivated fetal bovine serum (FBS) | Atlanta Biologicals | S11150                |
| Penstrep (10,000U mL <sup>-1</sup> )      | Thermo Fisher       | 15140122              |
| G418                                      | Thermo Fisher       | 10131035              |
| Trypsin-EDTA (0.05%), phenol red          | Thermo Fisher       | 25300054              |
| DPBS, no calcium and no magnesium         | Thermo Fisher       | 14190144              |

## Supplementary Figures

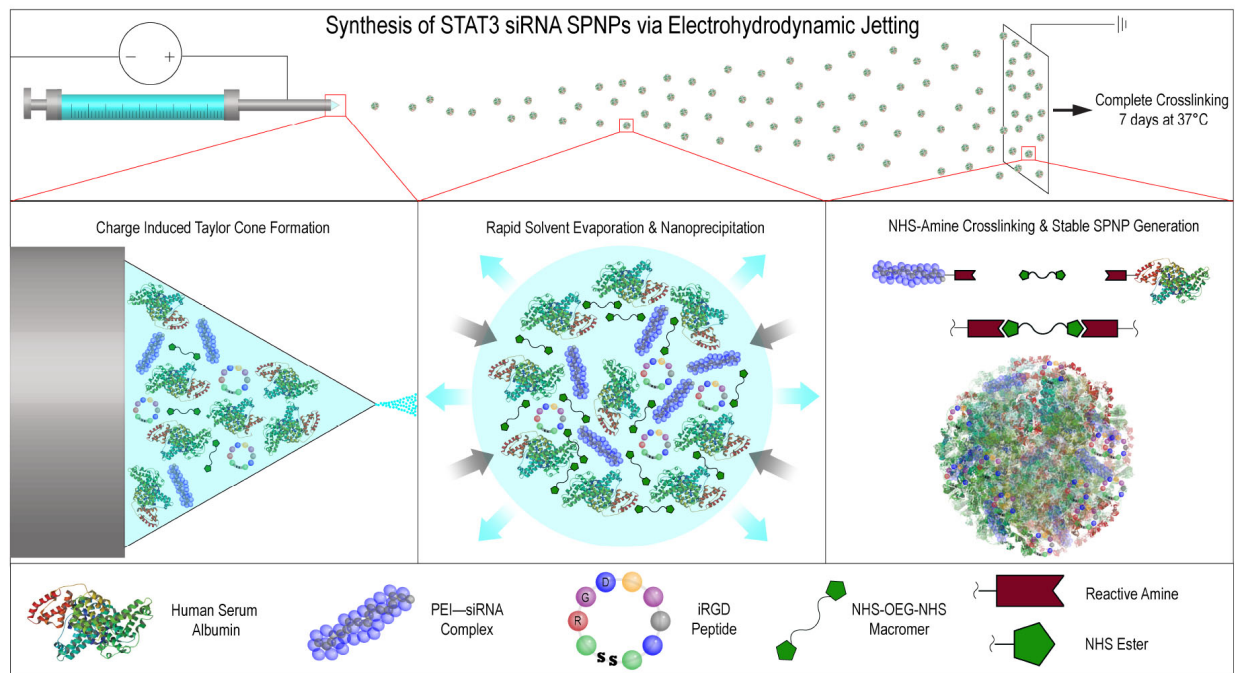

**Supplementary Figure 1. Synthesis of STAT3i SPNPs.** Electrohydrodynamic (EHD) jetting uses a dilute solution of all components to be incorporated into the ultimate protein nanoparticle (here: HSA, OEG macromer, STA3i-PEI complex, and iRGD in an aqueous system). Using controlled flow through a single capillary, the application of an electric field distorts the droplet to form a stable Taylor Cone from which a jet of charged droplets emanates. Once atomized, rapid evaporation of the solvent induces nearly instantaneous nanoprecipitation of all non-volatile components to form solid protein nanoparticles. The bifunctional OEG macromer covalently links the protein and PEI units through reactive amine groups, resulting in a continuous network. The STAT3i is complexed to the PEI through electrostatic interactions, while the iRGD is encapsulated.

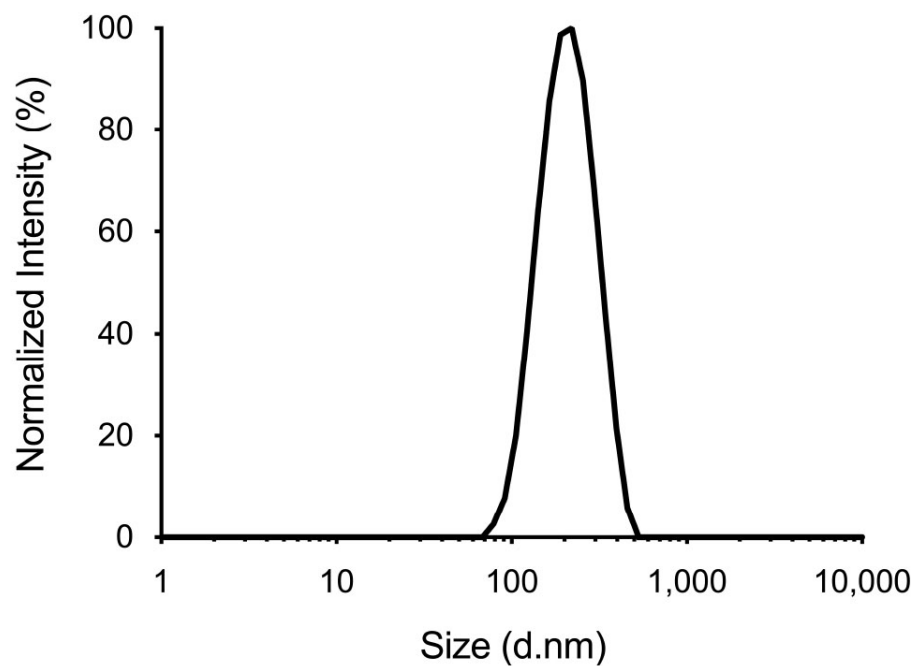

**Supplementary Figure 2. SPNPs are stable at physiological conditions.** Characterization of SPNPs size was measured by dynamic light scattering (DLS) following the collection process and storage in PBS (pH 7.4) at 4°C. Particles were observed to swell with an increase in average size compared to their dry, crosslinked state. Average diameter = 220 nm. No change was observed in average particle diameter over a period of 1 month at the above conditions.

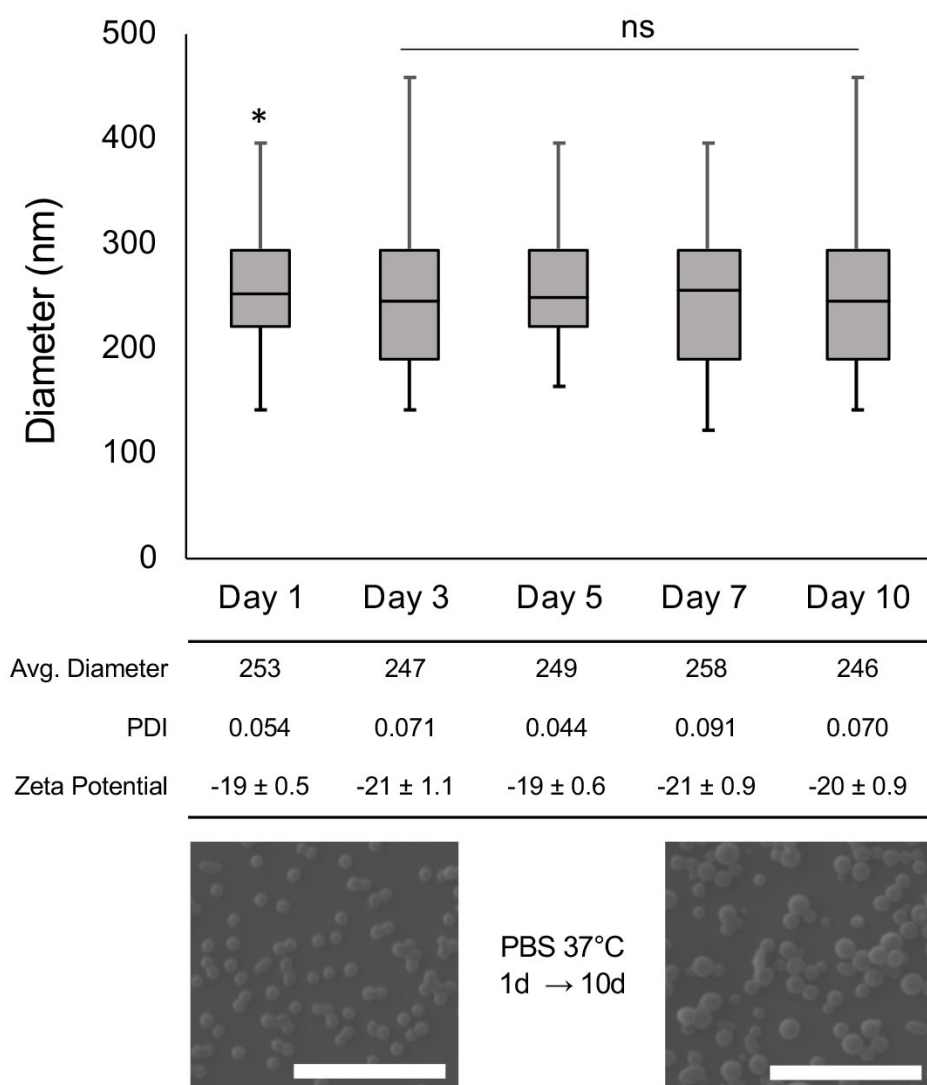

**Supplementary Figure 3. SPNPs remain stable in solution under relevant physiological conditions.** (Top) After a single day in PBS at 37°C, SPNPs show no significant change in particle size as measured by dynamic light scattering (DLS). Particles appear to both remain intact and do not aggregate under these conditions. Similarly, the polydispersity index (PDI) and zeta potential values remain consistent over the ten day incubation period. Hydrodynamic diameter data from  $n = 5$  technical replicates was collected and averaged provided the data met minimum quality standards including a correlation function with a single inflection point. Box and whisker plot data are presented as mean values, first and third quartiles (box) and minimum/maximum values (whiskers), Statistical significance determined with one-way ANOVA and Tukey's multiple comparison test, \*  $p = 0.044$ . (Bottom) No change in particle shape or morphology is observed following the incubation at physiological conditions as imaged by scanning electron microscopy (SEM). Scale bars = 2  $\mu\text{m}$ .

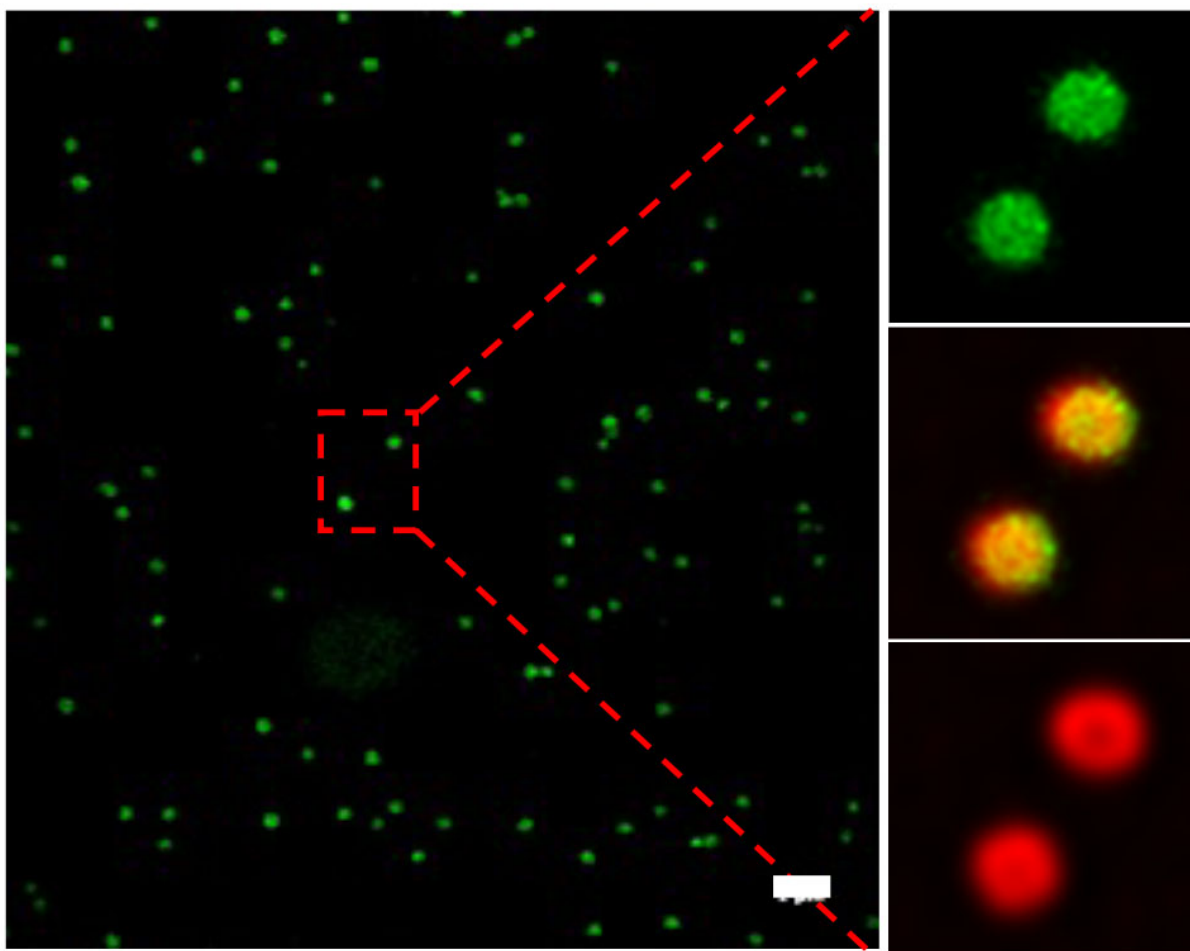

**Supplementary Figure 4. SPNPs loaded with Cyanine3-siRNA exhibit controlled siRNA release.** Alexa Fluor 488 (green) labeled SPNPs were loaded with a fluorescently (Cy3, red) labeled, scrambled siRNA. Several images were collected across a single prepared sample using super-resolution, Stimulation Emission Depletion (STED) microscopy. Colocalization of the two signals was used to confirmed the encapsulation of siRNA within the particles. Scale bar = 1  $\mu\text{m}$ .



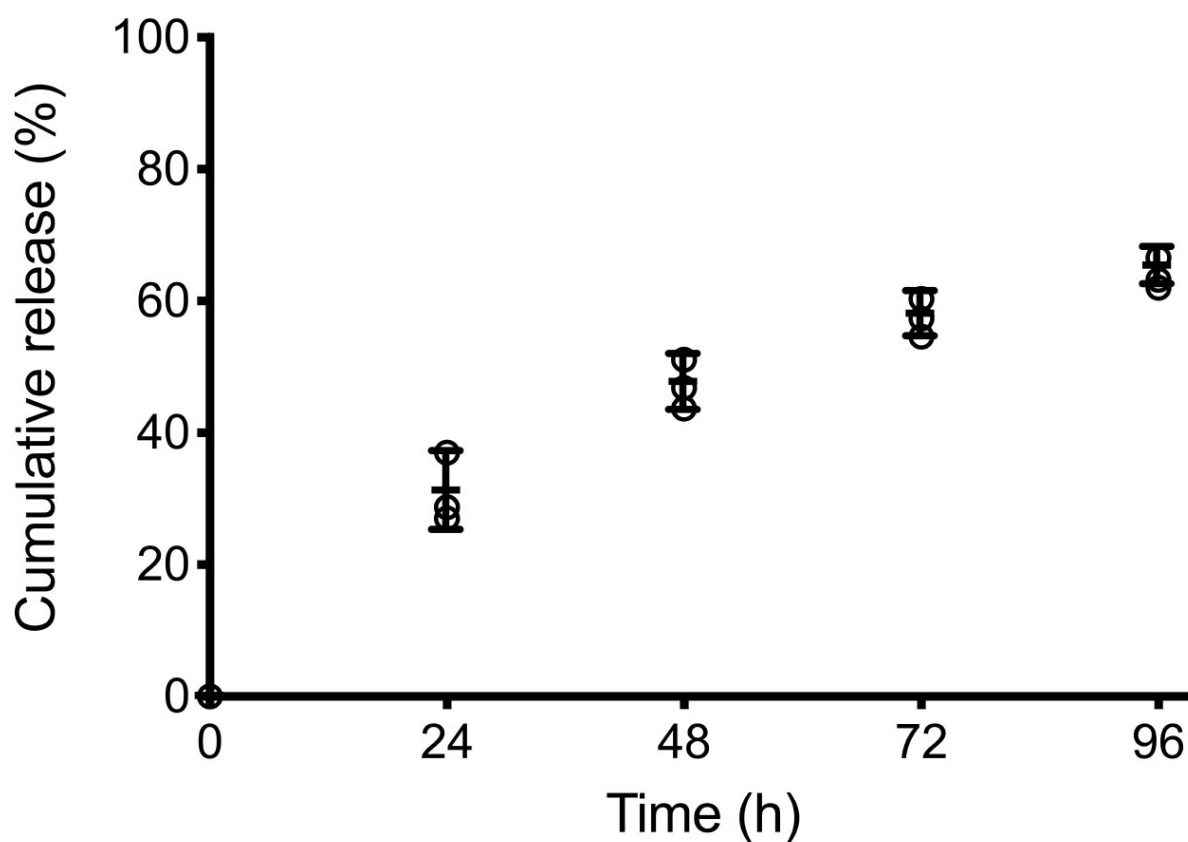

**Supplementary Figure 5. Controlled siRNA release from SPNPs.** Loading and subsequent release of Cy3-labeled scrambled siRNA demonstrates a controlled and extended release of incorporated NP cargo. While 60% of the initially encapsulated siRNA is released in the first 96 hours at pH 7.4 and 37°C, continued release is observed for up to 21 days. Complete release confirms a loading efficiency of 96%. Data are presented as mean values  $\pm$  s.d. (n = 3 biological replicates).

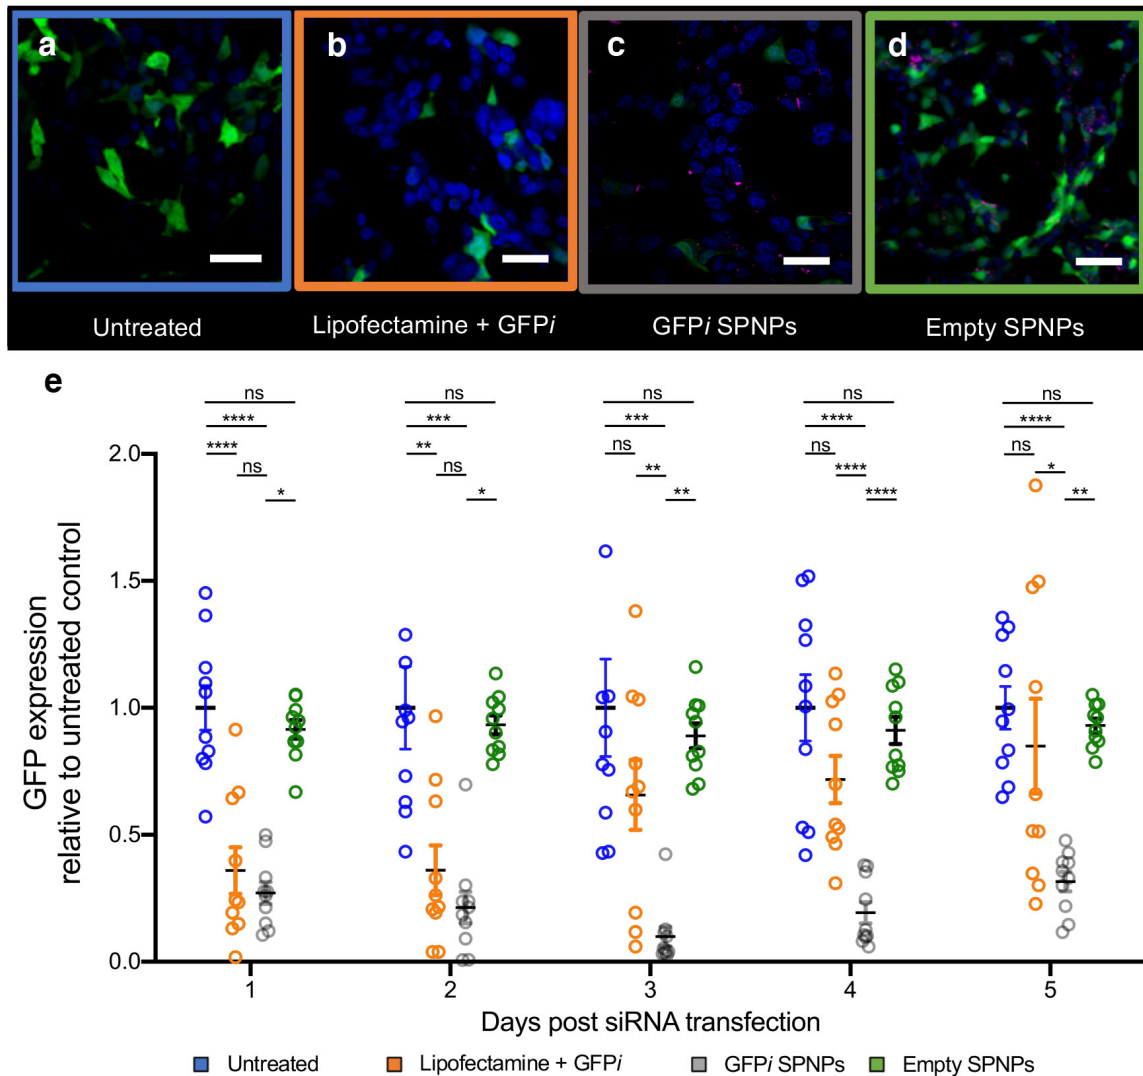

**Supplementary Figure 6. *in vitro* GFP siRNA-loaded SPNPs reduce target protein expression.** (a)-(d) Representative Confocal Scanning Laser Microscopy (CSLM) images of GL26-Cit cells incubated with NPs at 48 h time point. (a) Control group receiving no treatment. (b) Positive control group transfected with GFP siRNA (GFPi) using Lipofectamine 2000. (c) Cells treated with GFPi loaded nanoparticles at a concentration of 25  $\mu$ g NPs per mL. (d) Cells treated with empty albumin nanoparticles. (e) GFP expression plotted relative to untreated control group over a period of 5 days. A significant and prolonged suppression of target protein is observed in cells that received the siRNA-loaded nanoparticles. A similar knockdown was observed in cells transfected with free siRNA using Lipofectamine at early time points, but a rapid recovery was observed after 48 h. Data are presented as mean values  $\pm$  SEM relative to untreated control (n = 10 independent composite images; two-tailed, unpaired t-tests; \*\*\*\* p < 0.0001, \*\*\* p < 0.001, \*\* p < 0.01, \* p = 0.028, \* p(2) = 0.007, \* p(5) = 0.012). Scale bars = 50  $\mu$ m.

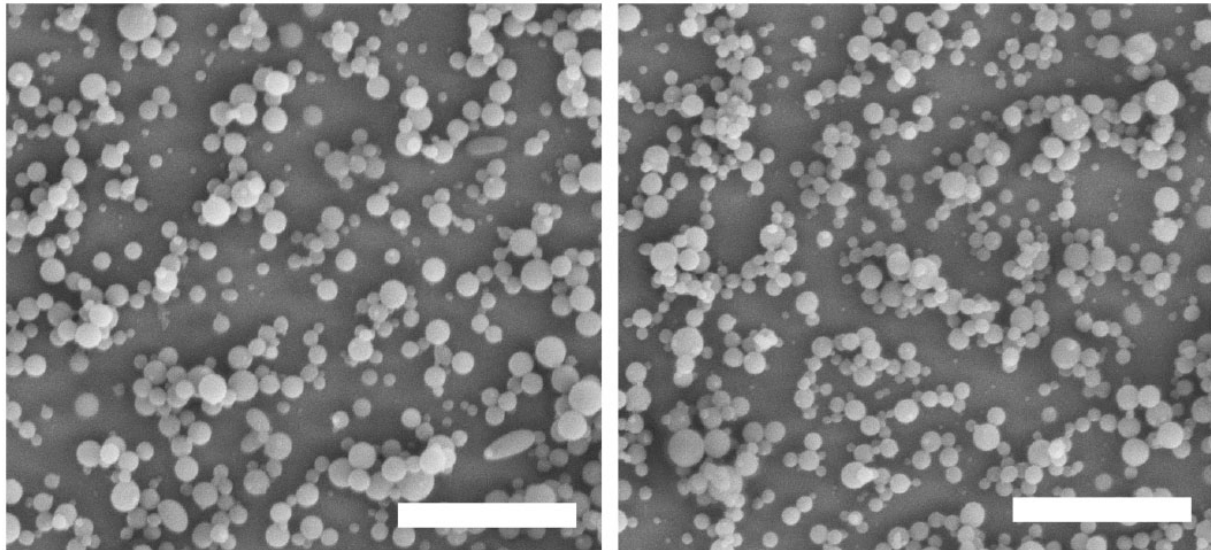

**Supplementary Figure 7. siRNA-loaded SPNPs exhibit similar size and morphology to control SPNPs.** The addition of the siRNA/PEI complex to the jetting solution to create siRNA-loaded SPNPs (left) results in no significant change in particle size, shape or surface morphology when compared to control (empty) SPNPs (right). When suspended in PBS, no significant difference in zeta potential (siRNA-loaded SPNPs  $\zeta = -20 \pm 1.2$ , Control SPNPs  $\zeta = -19 \pm 2.9$ ) was observed. Imaging and characterization was performed following the synthesis of particles for all in vitro and in vivo experiments. Across ten independently synthesized batches, similar results were observed when comparing SPNPs with and without siRNA/PEI. Scale bars = 2  $\mu\text{m}$ .

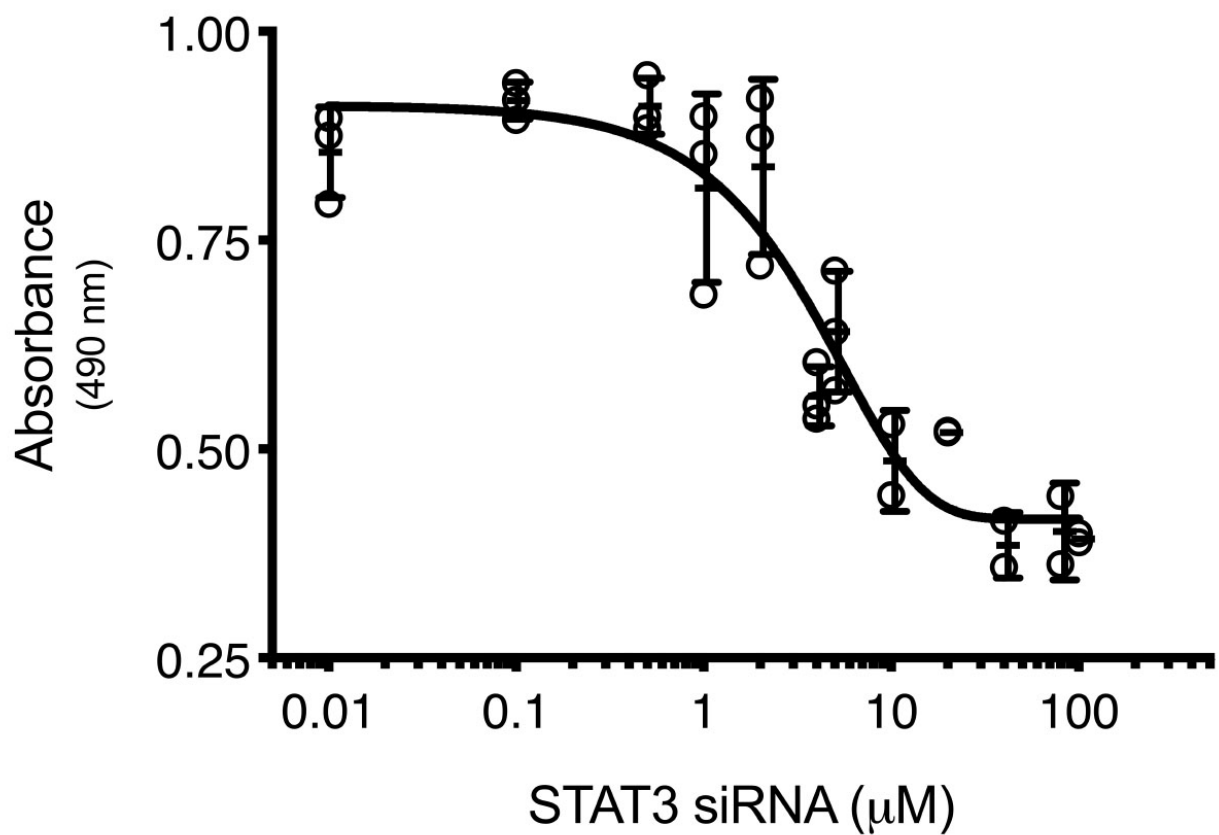

**Supplementary Figure 8. STAT3 siRNA activity is non-toxic towards glioma cells.** Evaluating toxicity associated with free STAT3i, no toxicity was observed at relevant therapeutic concentrations. Concentrations delivered via SPNPs showed a significant silencing ability ( $6.5 \times 10^{-4} \mu\text{M}$ ), 6,000x less than the IC50 ( $3.85 \mu\text{M}$ ) for soluble siRNA delivered via traditional transfection. Data are presented as mean values  $\pm$  s.d. (n = 3 biological replicates).

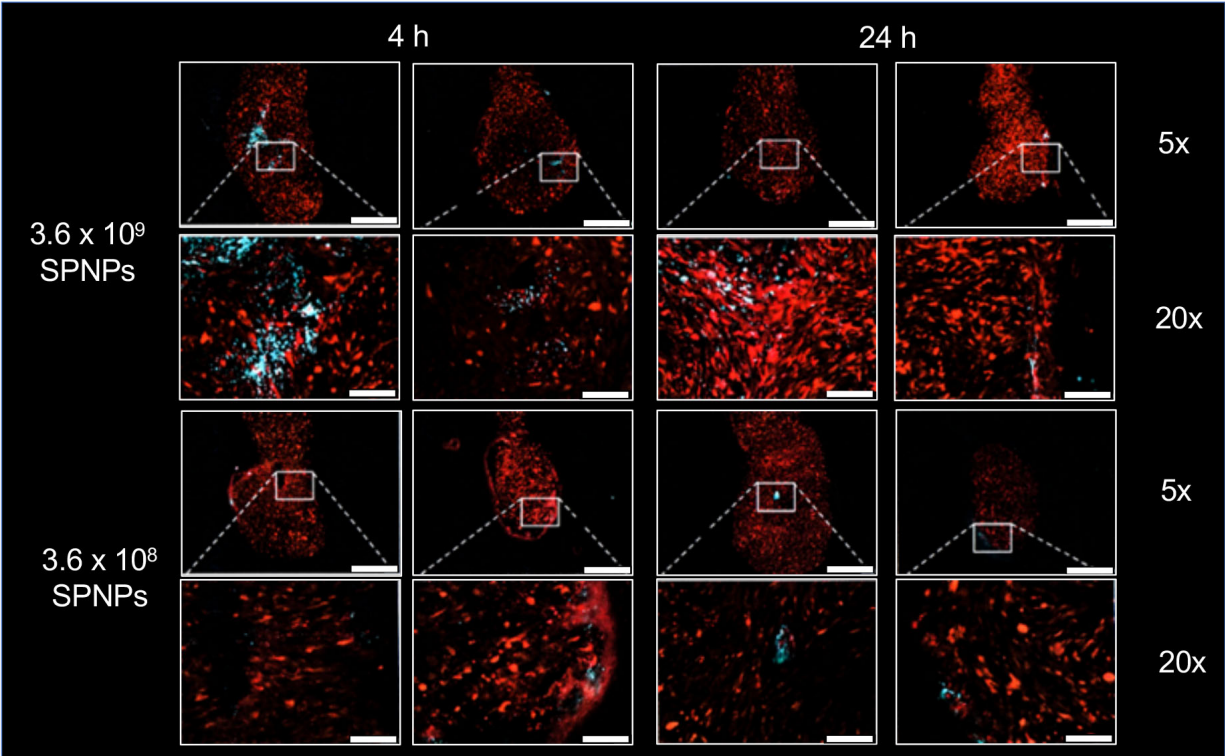

**Supplementary Figure 9. SPNPs distribution in the tumor mass following intracranial injection.** Following the implantation of m-Tomato expressing GL26 tumors (red), C57BL/6 mice received 3  $\mu$ L intracranial injections of either  $3.6 \times 10^8$  or  $3.6 \times 10^9$  SPNPs (cyan) per mouse. Images suggest that the particles actively and rapidly distribute throughout the tumor mass. Scale bars = 150  $\mu$ m (5x), 600  $\mu$ m (20x).

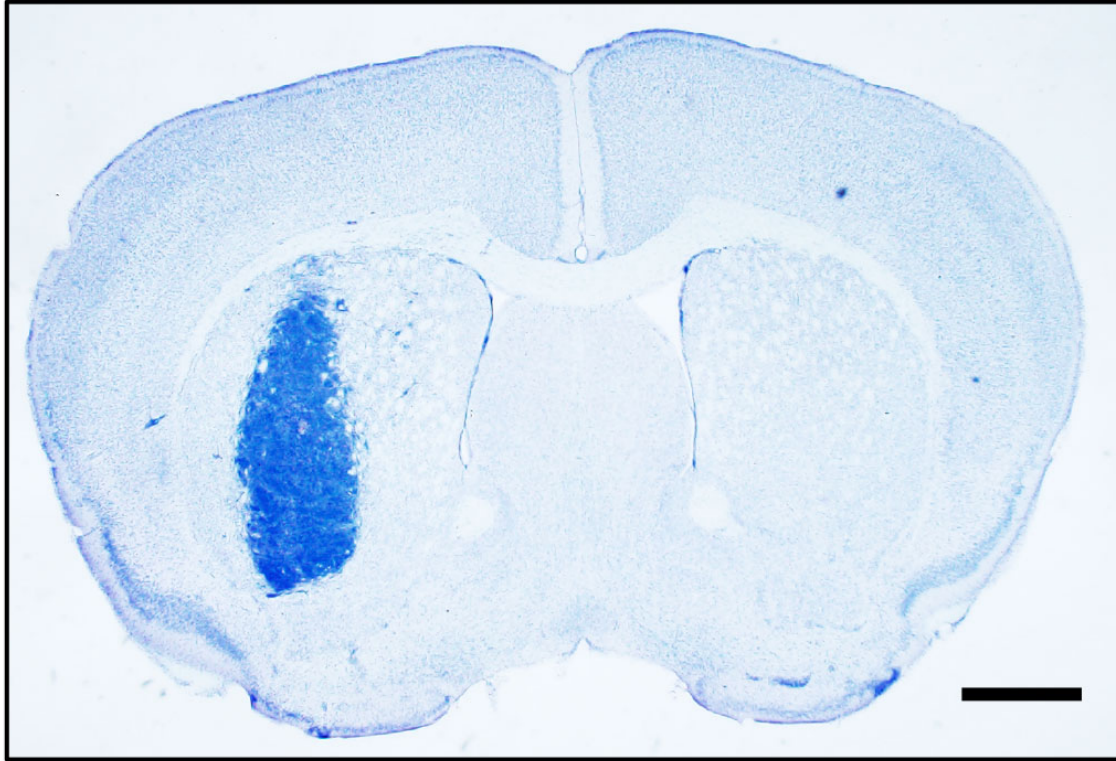

**Supplementary Figure 10. Volume of GL26 GBM at 7 DPI.** C57BL/6 mice were implanted with 20,000 GL26 cells orthotopically and brains were processed for Nissl staining at 7 DPI. Staining and imaging was conducted as a single independent experiment. Scale bar = 1 mm. Tumor volume = 9.61 mm<sup>3</sup>. Tumor area = 107 pixel units.

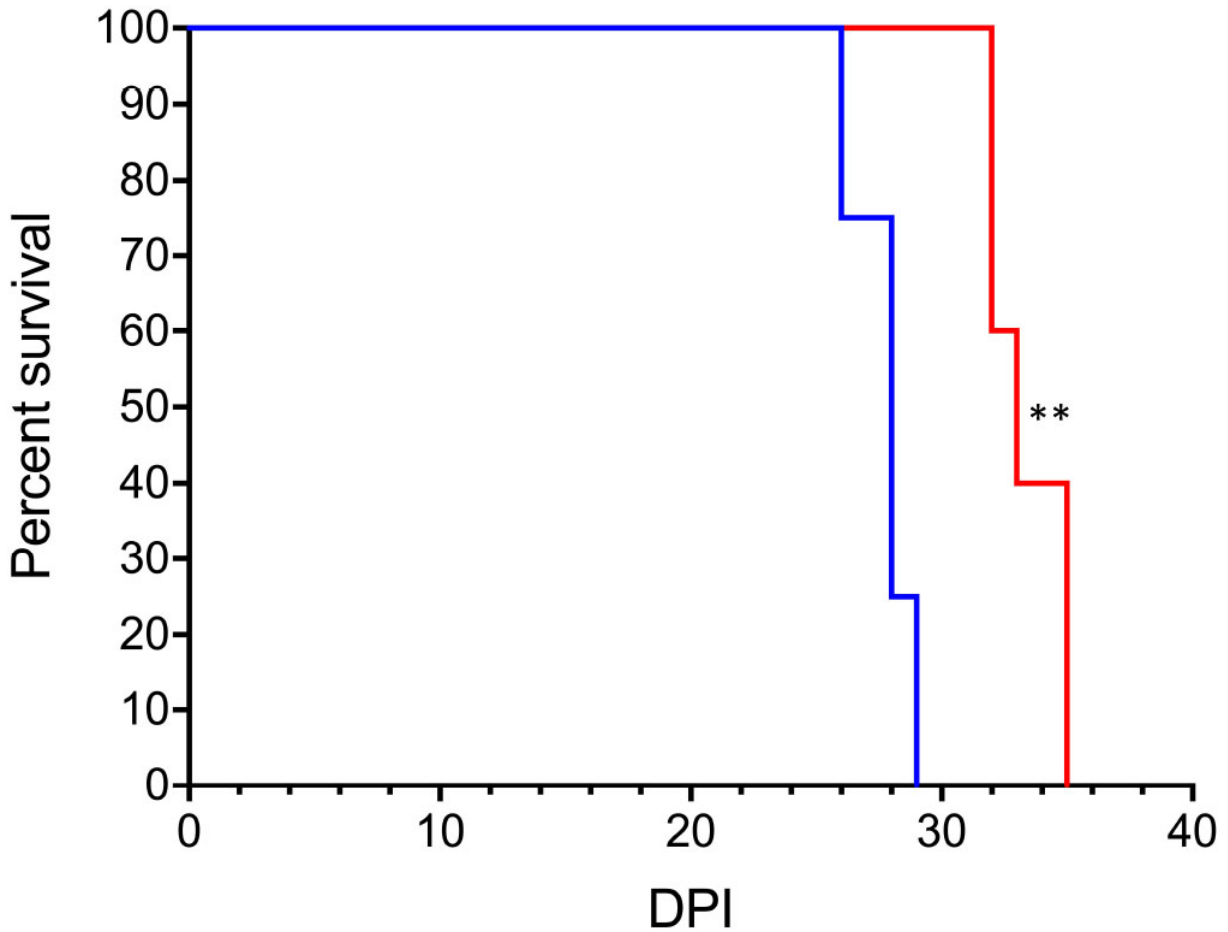

**Supplementary Figure 11. Kaplan-Meier survival curve for single dose of STAT3i SPNPs.** C57BL6 mice were implanted with GL26 cells. A single dose of  $2.0 \times 10^{11}$  STAT3i SPNPs were delivered via tail vein injection five days post tumor implantation. Mice treated with siRNA-loaded particles (red, n = 5) had a median survival of 33 days, 5 days longer than mice in the saline treated control group (blue, n = 4). Data were analyzed using the log-rank (Mantel-Cox) test. \*\* p = 0.0029, MS = median survival.

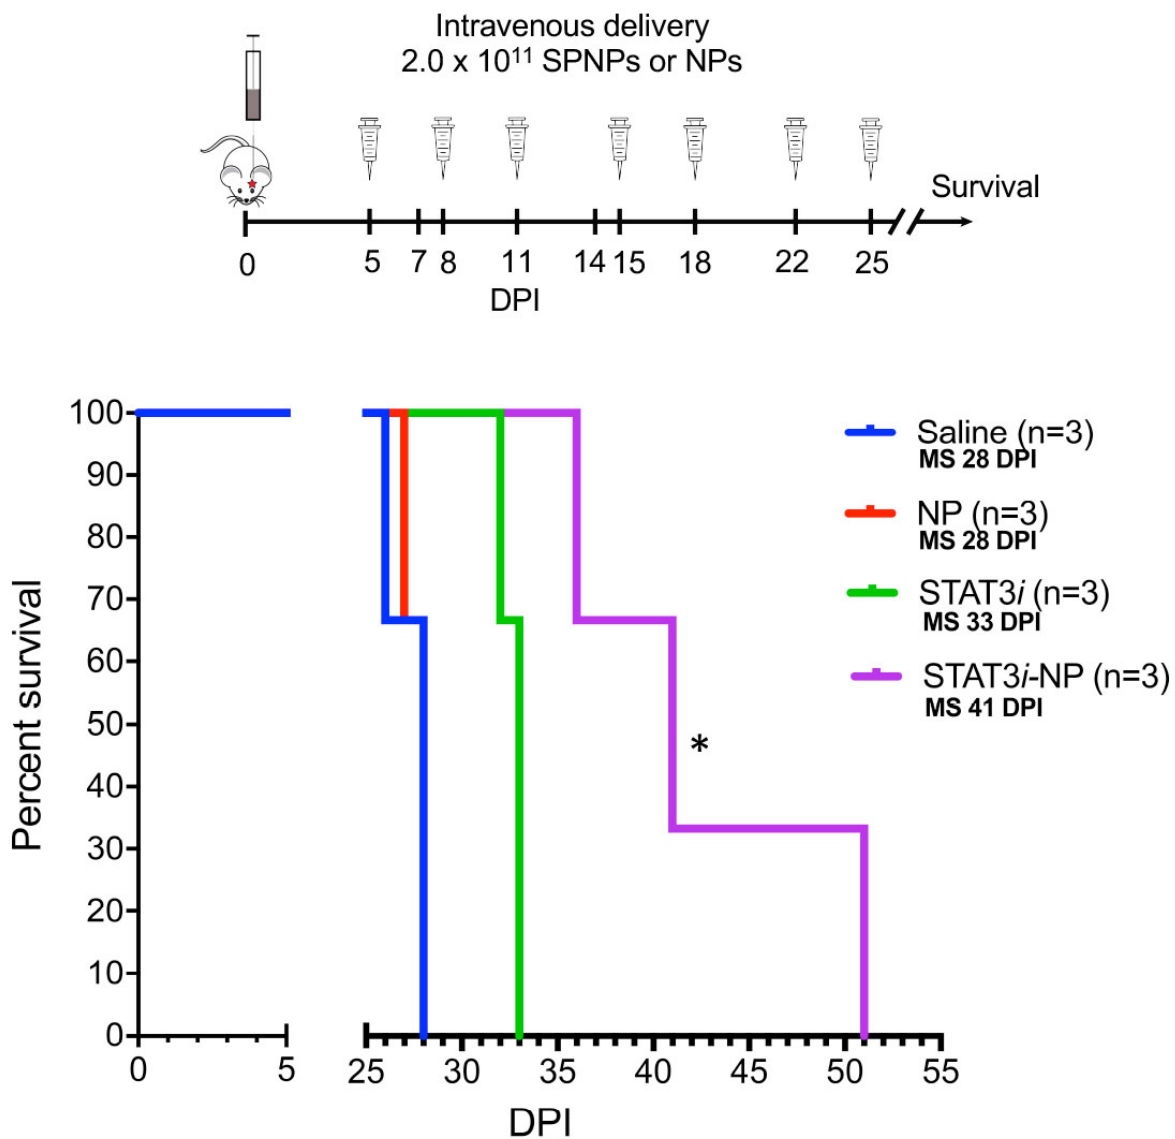

**Supplementary Figure 12. Three-week STAT3i SPNP treatment regimen extends median survival.** C57BL/6 mice were implanted with GL26 cells, at 5 DPI mice were treated with  $2.0 \times 10^{11}$  STAT3i SPNPs. STAT3i SPNPs delivered via tail vein (IV) injection. STAT3i SPNPs elicited a 46% increase in median survival compared to saline treated control mice (MS = 41 vs. 28). Soluble IV administered STAT3i showed a moderate therapeutic effect (MS = 33 vs. 28) while mice treated with vehicle SPNPs saw no effect. Data were analyzed using the log-rank (Mantel-Cox) test. \*  $p = 0.0052$ , MS = median survival.



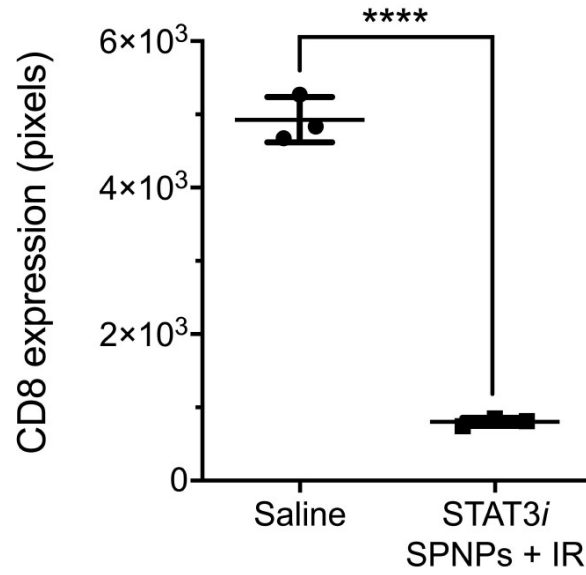

**Supplementary Figure 13. Quantification of CD8 Expression in TME.** Immunofluorescence staining of tumors in either saline or STAT3i SPNP + IR treatment groups was quantified using otsu threshold by ImageJ. Data represent total number of positive cells for CD8 in saline (28 DPI) versus. STAT3i SPNPs + IR (90 DPI) long-term survivor. Data are presented as mean  $\pm$  s.d. (n = 3 biological replicates; two-tailed unpaired t-test; \*\*\*\* p < 0.0001).

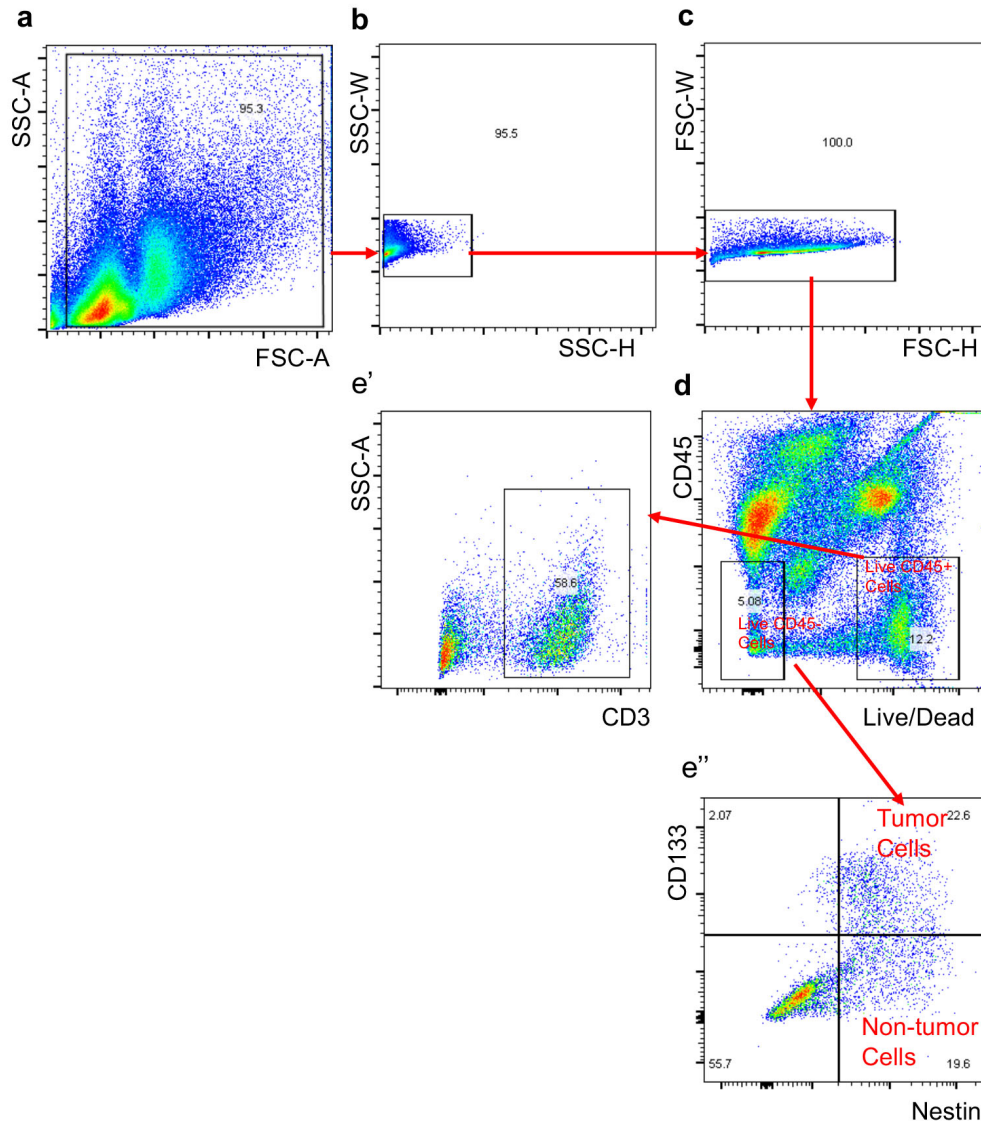

**Supplementary Figure 14. Sequential gating strategy for flow cytometry analysis of immunolabeled cells.** (a) Immunolabeled cells were gated to exclude cellular debris. (b)-(c) Doublet discrimination gating was performed to filter out cellular aggregates prior to analysis. (d) CD45<sup>+</sup>/Live cells were gated to identify GBM infiltrating M1 (CD45<sup>+</sup>/F480<sup>+</sup>/CD206<sup>-</sup>), and M2 (CD45<sup>+</sup>/F480<sup>+</sup>/CD206<sup>+</sup>) macrophages shown in Fig. 5a as well as cDCs (CD45<sup>+</sup>/CD11c<sup>+</sup>/B220<sup>-</sup>) shown in Fig. 5b. CD45<sup>+</sup>/Live cells were gated to identify tumor cells. (e') Identification of live CD3<sup>+</sup> cells from the CD45<sup>+</sup>/Live parent gate in (d) to determine the amount of GBM specific T cells (CD45<sup>+</sup>/CD3<sup>+</sup>/CD8<sup>+</sup>/ H2Kb-OVA tetramer<sup>+</sup>), and cytotoxic T cells (CD45<sup>+</sup>/CD3<sup>+</sup>/CD8<sup>+</sup>/ IFN- $\gamma$  or CD45<sup>+</sup>/CD3<sup>+</sup>/CD8<sup>+</sup>/ granzyme B) in the TME shown in Fig. 3f. (e'') Identification of CD133<sup>+</sup>/nestin<sup>+</sup> GBM cells from the CD45<sup>+</sup>/live parent gate in (d) for  $\alpha v\beta 3$  and  $\alpha v\beta 5$  integrin expression analysis shown in Fig. 1f.

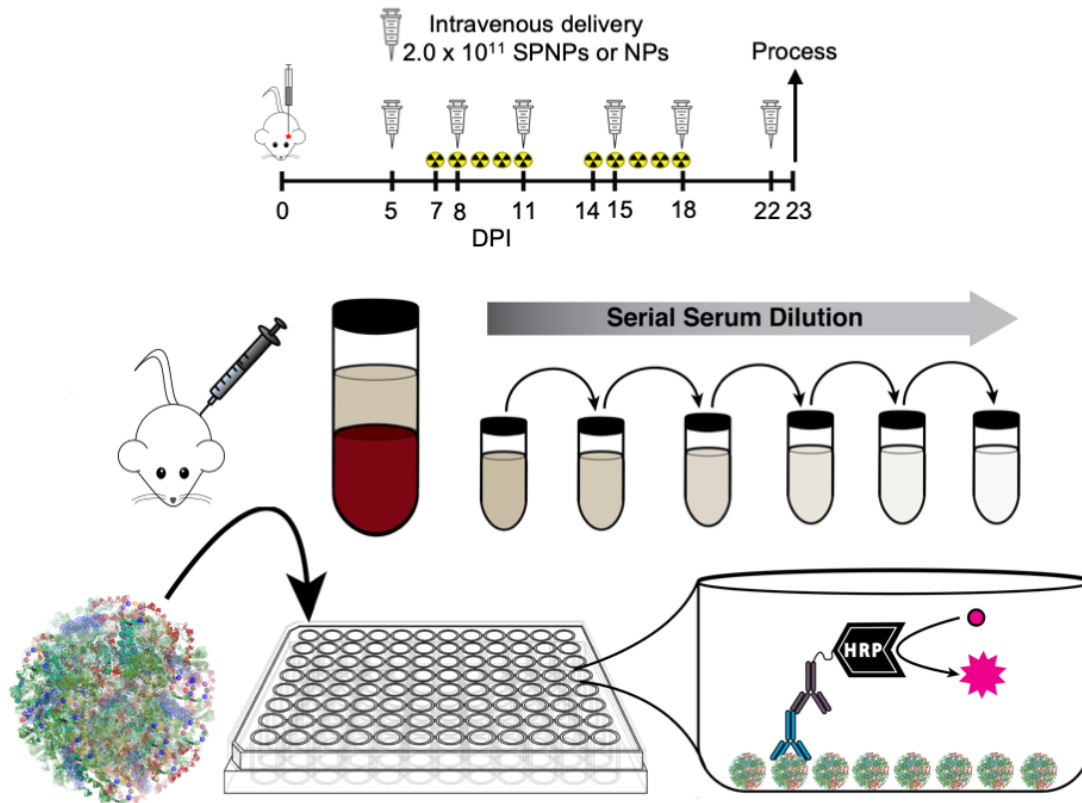

**Supplementary Figure 15. Evaluation of circulating antibodies against STAT3i SPNPs.** Following complete STAT3i SPNPs + IR treatment, a modified ELISA protocol was used to detect the presence of circulating antibodies against SPNPs in serum of GL26 tumor bearing mice.

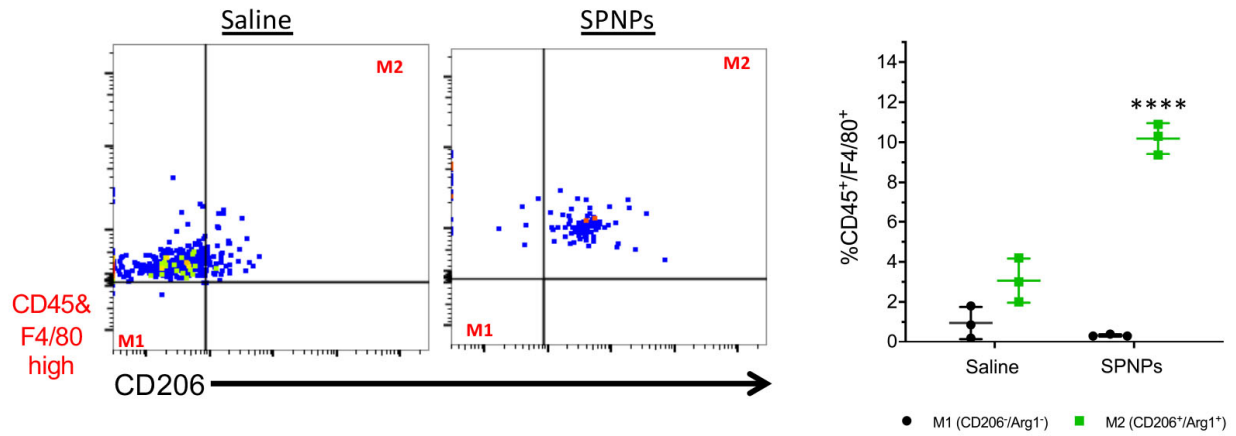

**Supplementary Figure 16. SPNPs treatment induces a shift in the TME macrophage balance.** Treatment of GL26 tumor-bearing mice with empty SPNPs produced a shift in macrophage populations within the tumor microenvironment. An increase in the M2 macrophages relative to saline treated control animals was observed. Data are presented as mean values  $\pm$  s.d. (n = 3 biological replicates; two-way ANOVA; \*\*\*\* p < 0.0001)

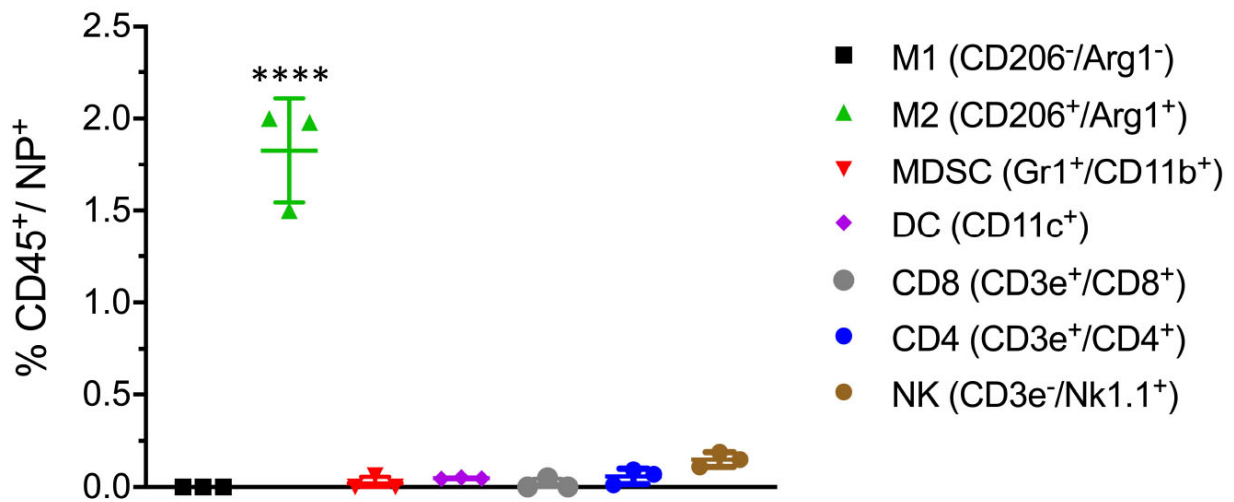

**Supplementary Figure 17. Among TME immune cells, only M2 macrophages showed significant uptake of SPNPs.** Flow cytometry analysis of immune cells collected from the tumor microenvironment of SPNPs treated mice show significant nanoparticle uptake by M2 macrophages and minimal uptake by all other immune cell types. Data are presented as mean values  $\pm$  s.d. (n = 3 biological replicates; two-way ANOVA; \*\*\*\* p < 0.0001).

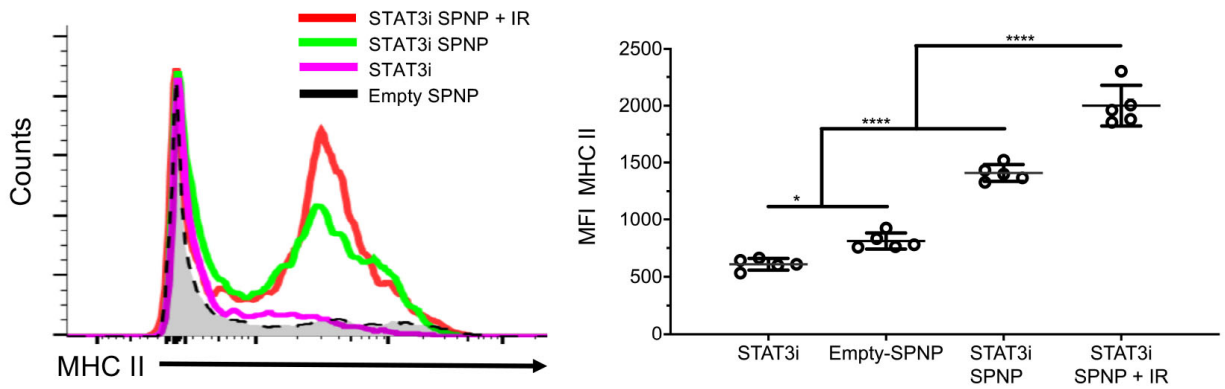

**Supplementary Figure 18: Dendritic cell MHC II expression.** Activation status of DCs in the draining lymph node of GBM bearing mice treated with STAT3i, empty SPNP, STAT3i SPNP, and STAT3i SPNP + IR was assessed one day post the last day of treatment (23 DPI). Representative histograms display MHC II expression level on the DCs (purple = STAT3i, black = empty SPNP, red = STAT3i SPNP + IR, green = STAT3i SPNP). Data is presented as mean values  $\pm$  s.d. (n = 5 biological replicates; one way ANOVA; \*\*\*\* p < 0.0001, \* p = 0.036).

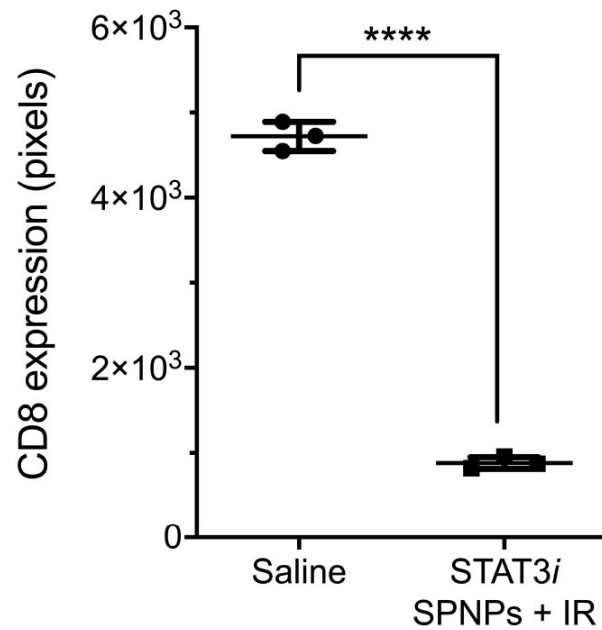

**Supplementary Figure 19. Quantification of CD8 expression in rechallenged long-term survivor TME.** Immunofluorescence staining of tumors in each treatment group was quantified using otsu threshold by ImageJ. Data represent total number of positive cells for CD8 in saline (28 DPI) versus STAT3i SPNPs + IR (90 DPI post rechallenged; 180 DPI post initial tumor implantation) rechallenged long-term survivor. Data are presented as mean values  $\pm$  s.d. (n = 3 biological replicates; two-tailed, unpaired t-test; \*\*\*\* p < 0.0001).
